# Supplementary material for: Selenide Heterostructure Nanosheets with Efficient Near-Infrared Photothermal Conversion for Therapy
Source: PubMed Central journal article supplement — ACS Omega. 2023 Mar 3;8(10):9371–8. doi: 10.1021/acsomega.2c07964 (PMC10018708; doi:10.1021/acsomega.2c07964), 2023-03-03
Supplement: ao2c07964_si_001.pdf [file ao2c07964_si_001.pdf]

## **Supporting information**

# **Selenide heterostructure nanosheets with efficient near-infrared photothermal conversion for therapy**

Yanbang Lian<sup>1</sup>, Congcong Wang<sup>2</sup>, Yu Meng<sup>3</sup>, Junqiang Dong<sup>1</sup>, Jianbin Zhang<sup>4</sup>,

Shiqing Xu<sup>2</sup>, Gongxun Bai<sup>2\*</sup>, Jianbo Gao<sup>1\*</sup>

<sup>1</sup>Radiology Department, The First Affiliated Hospital of Zhengzhou University, Zhengzhou 450052, China

<sup>2</sup>Key Laboratory of Rare Earth Optoelectronic Materials and Devices of Zhejiang Province, College of Optical and Electronic Technology, China Jiliang University, Hangzhou 310018, China

<sup>3</sup>Oncology Department, The First Affiliated Hospital of Zhengzhou University, Zhengzhou 450052, China

<sup>4</sup>Department of Medical Oncology, Zhejiang Provincial People's Hospital, Affiliated People's Hospital, Hangzhou Medical College, Hangzhou 310014, China

E-mail: cjr.gaojianbo@vip.163.com (J. Gao), baigx@cjlu.edu.cn (G. Bai)

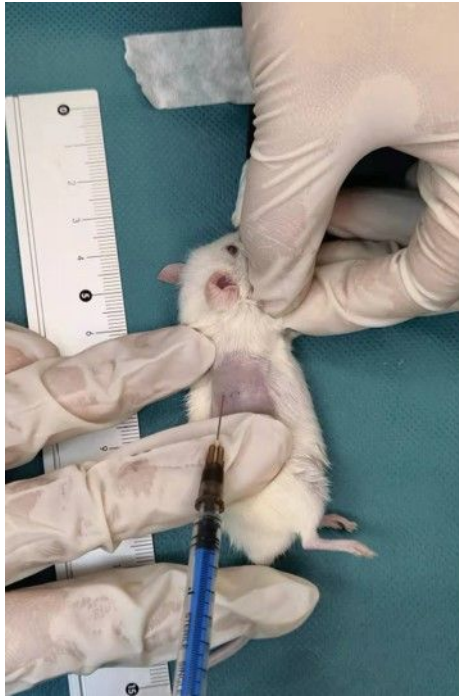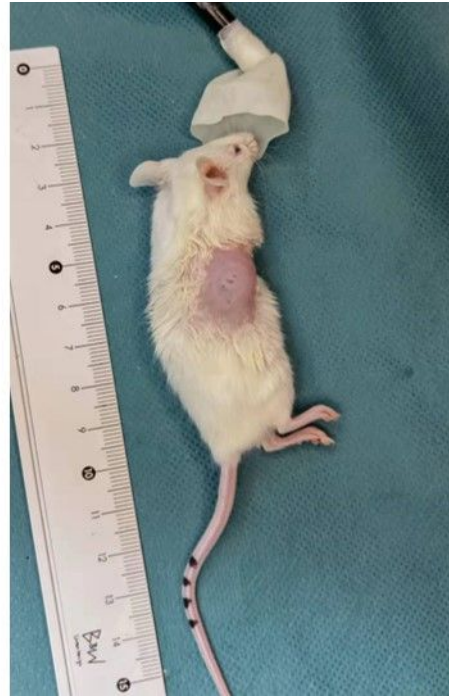

Figure S1 *In Vitro* Experiments with mice.

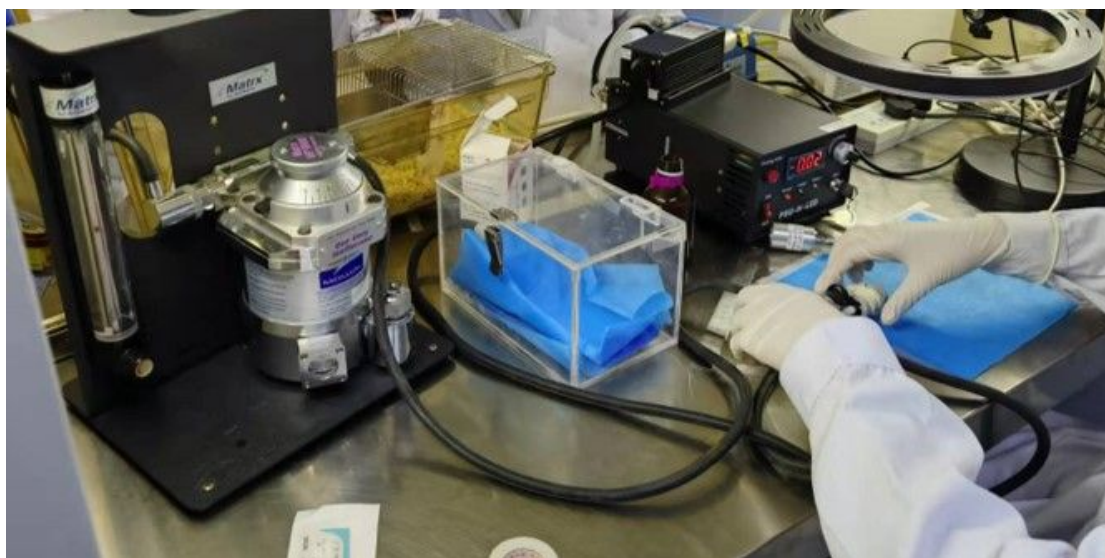

Figure S2 *In Vitro* Experimental operations.

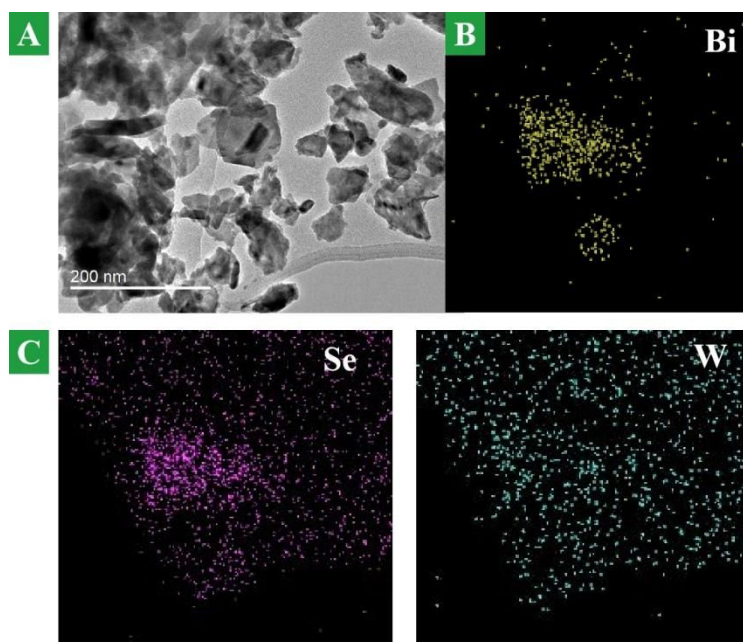

Figure S3 (A) The HR-TEM images of BW heterostructure nanosheets. The energy dispersive mapping of (B) Bi, (C) W, and Se in BW heterostructure nanosheets.
